# Supplementary material for: Eine Familie mit Malaria tropica
Source: Springer Nature journal article supplement (doi:10.1007/s10049-024-01289-3), 2024-02-09
Supplement: MOESM1 [file 26720698]

Zusatzmaterial zum Beitrag „Eine Familie mit Malaria tropica“ von Markus Wörnle et al. (2024) in *Notfall+Rettenungsmedizin*.

Beitrag und Zusatzmaterial stehen Ihnen auf [www.springermedizin.de](http://www.springermedizin.de) zur Verfügung. Bitte geben Sie dort den Beitragstitel in die Suche ein.

## Therapiekonzepte der Malaria

| Therapie der <u>unkomplizierten</u> Malaria (nach DTG Leitlinie <sup>1</sup> )                |                                                                                                      |                                                                                                                                                                                                                                                                                             |
|-----------------------------------------------------------------------------------------------|------------------------------------------------------------------------------------------------------|---------------------------------------------------------------------------------------------------------------------------------------------------------------------------------------------------------------------------------------------------------------------------------------------|
|                                                                                               |                                                                                                      |                                                                                                                                                                                                                                                                                             |
| Artemether/Lumefantrin                                                                        |                                                                                                      |                                                                                                                                                                                                                                                                                             |
| Einzeldosis                                                                                   | Dosierschema*                                                                                        | Besonderheiten                                                                                                                                                                                                                                                                              |
| Ab 35 kg KG:<br>80 mg/480 mg<br>(entspr. 4 Tabletten<br>Riamet® à 20 mg/120 mg)               | 2x täglich für 3 Tage<br>(insgesamt 6 Dosen über 60 Stunden:<br>0, 8, 24, 36, 48 und 60h)            | Mit einer fetthaltigen Mahlzeit<br>oder Milch einnehmen<br>Interaktionen s. Fachinformation                                                                                                                                                                                                 |
| * Bei sehr hohem Körpergewicht und/oder höherer Parasitämie Therapiedauer von 5 Tagen erwägen |                                                                                                      |                                                                                                                                                                                                                                                                                             |
|                                                                                               |                                                                                                      |                                                                                                                                                                                                                                                                                             |
| Dihydroartemisinin/Piperaquin                                                                 |                                                                                                      |                                                                                                                                                                                                                                                                                             |
| Einzeldosis                                                                                   | Dosierschema                                                                                         | Besonderheiten                                                                                                                                                                                                                                                                              |
| 36-75 kg KG:<br>120 mg/960 mg<br>(entspr. 3 Tabletten<br>Eurartesim® à 40 mg/320<br>mg)       | 1x täglich im Abstand von 24 h an drei<br>aufeinanderfolgenden Tagen<br>(insgesamt 3 Dosen)          | Auf nüchternen Magen im<br>Abstand von mindestens 3h zu<br>einer Mahlzeit mit Wasser<br>einnehmen.<br>EKG-Kontrolle zum Ausschluss<br>einer relevanten QTc-Ver-<br>längerung vor der 1. Dosis, vor der<br>3. Dosis und 4-6 h nach der dritten<br>Dosis.<br>Interaktionen s. Fachinformation |
| > 75kg KG*:<br>160 mg/1280 mg<br>(entspr. 4 Tabletten<br>Eurartesim® à<br>40mg/320mg)         |                                                                                                      |                                                                                                                                                                                                                                                                                             |
| *>100 kg KG: keine Daten                                                                      |                                                                                                      |                                                                                                                                                                                                                                                                                             |
|                                                                                               |                                                                                                      |                                                                                                                                                                                                                                                                                             |
| Atovaquon/Proguanil                                                                           |                                                                                                      |                                                                                                                                                                                                                                                                                             |
| Einzeldosis                                                                                   | Dosierschema                                                                                         | Besonderheiten                                                                                                                                                                                                                                                                              |
| Ab 40 kg KG:<br>1000 mg/400 mg<br>(entspr. 4 Tabletten<br>Malarone® à 250<br>mg/100 mg)       | 1x täglich im Abstand von 24 h<br>an drei aufeinanderfolgenden Tagen<br>(insgesamt 3 Dosen à 4 Tbl.) | Mit einer fetthaltigen Mahlzeit<br>oder Milch einnehmen.<br>Vorsicht bei höheren Parasitämien<br>aufgrund langsameren Wirk-<br>eintritts.<br>Interaktionen s. Fachinformation                                                                                                               |

<sup>1</sup> Leitlinie: Diagnostik und Therapie der Malaria (2021) [042-001I S1 Diagnostik-Therapie-Malaria 2021-08.pdf \(awmf.org\)](#) Zugriffen: 27. November 2023

| Therapie der <u>komplizierten</u> Malaria                                                 |                                                                         |                                                                                                                                                                            |
|-------------------------------------------------------------------------------------------|-------------------------------------------------------------------------|----------------------------------------------------------------------------------------------------------------------------------------------------------------------------|
| <b>Intravenöses Artesunat</b>                                                             |                                                                         |                                                                                                                                                                            |
| Einzeldosis                                                                               | Dosierschema                                                            | Besonderheiten                                                                                                                                                             |
| 2,4 mg/kg als langsamer Bolus über 5 Minuten i.v.<br>(entspr. 1 Amp. à 60 mg pro 25kg KG) | Zeitpunkt 0, 12 h, 24 h*, 48 h*, 72 h*<br>dann orale Anschlusstherapie. | Auflösen zunächst mit 1 ml Natriumbicarbonat, dann mit 5 ml NaCl 0,9% verdünnen auf 6 ml.<br>Orale Folgetherapie erforderlich analog Therapie bei unkomplizierter Malaria. |
| * Bei rascher Zustandsbesserung früherer Beginn der oralen Anschlusstherapie möglich      |                                                                         |                                                                                                                                                                            |

| Therapie der Malaria tropica <u>in der Schwangerschaft</u> |                    |                                                                                                                                                                                                                                       |
|------------------------------------------------------------|--------------------|---------------------------------------------------------------------------------------------------------------------------------------------------------------------------------------------------------------------------------------|
| Unkomplizierte Malaria tropica                             | 1. Trimenon        | Chininsulfat* oral + Clindamycin*<br><br><i>Alternativen bei Unverträglichkeit/fehlender Verfügbarkeit:</i><br>Artemether/Lumefantrin*                                                                                                |
|                                                            | 2. und 3. Trimenon | Artemether/Lumefantrin*<br>Dihydroartemisinin/Piperaquin (EKG Kontrolle vor Therapie)*<br><br><i>Alternativen bei fehlender Verfügbarkeit:</i><br>Chininsulfat* oral + Clindamycin*                                                   |
| Komplizierte Malaria tropica                               | 1. Trimenon        | Artesunat* (3 Tage i.v.) + Clindamycin* (7 Tage i.v. oder p.o.)<br><br><i>Alternativ bei fehlender Verfügbarkeit:</i><br>Chinindihydrochlorid* i.v. + Clindamycin*                                                                    |
|                                                            | 2. und 3. Trimenon | Artesunat, gefolgt von Artemether/Lumefantrin<br>Artesunat, gefolgt von Dihydroartemisinin/Piperaquin (EKG Kontrolle vor Therapie)<br><br><i>Alternativ bei fehlender Verfügbarkeit:</i><br>Chinindihydrochlorid* i.v. + Clindamycin* |
| * Off-Label-Use bzw. keine Zulassung in Deutschland        |                    |                                                                                                                                                                                                                                       |
